# Supplementary material for: Dye-sensitized solar cells under ambient light powering machine learning: towards autonomous smart sensors for the internet of things
Source: Royal Society of Chemistry journal article supplement (doi:10.1039/c9sc06145b), 2020-01-01
Supplement: c9sc06145b2.pdf [file c9sc06145b2.pdf]

## Supplementary Information for

### ***Dye-sensitized solar cells under Ambient Light Powering Machine Learning: Towards autonomous smart sensors for Internet of Things***

Hannes Michaels, Michael Rinderle, Richard Freitag, Iacopo Benesperi, Tomas Edvinsson,  
Richard Socher, Alessio Gagliardi, Marina Freitag

Correspondence to: [marina.freitag@newcastle.ac.uk](mailto:marina.freitag@newcastle.ac.uk)

#### **This PDF file includes:**

Figures S1-S11

Tables S1-S6

**Fig. S1** Structures of dyes and copper complexes.

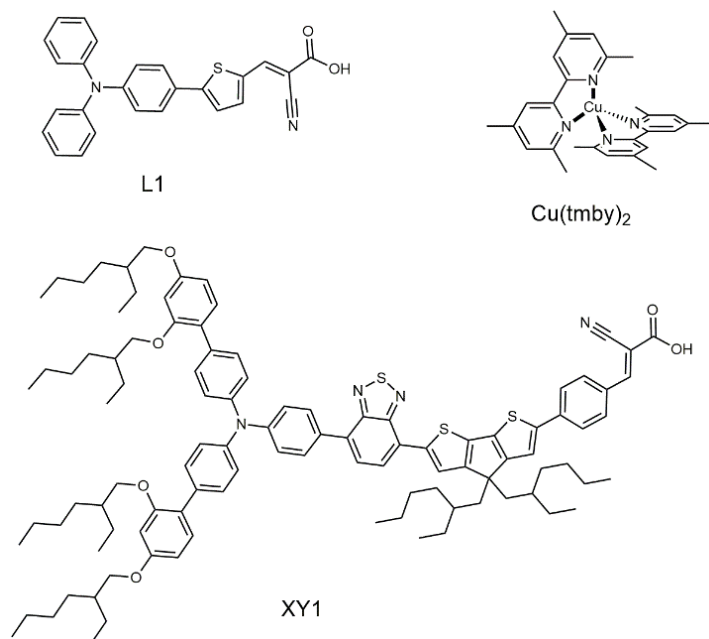

**Fig. S1.** Chemical structures of investigated dyes L1, XY1 as well as copper redox mediator Cu(tmby)<sub>2</sub> (counterions omitted for clarity).

**Fig. S2.** Photovoltaic characterization.

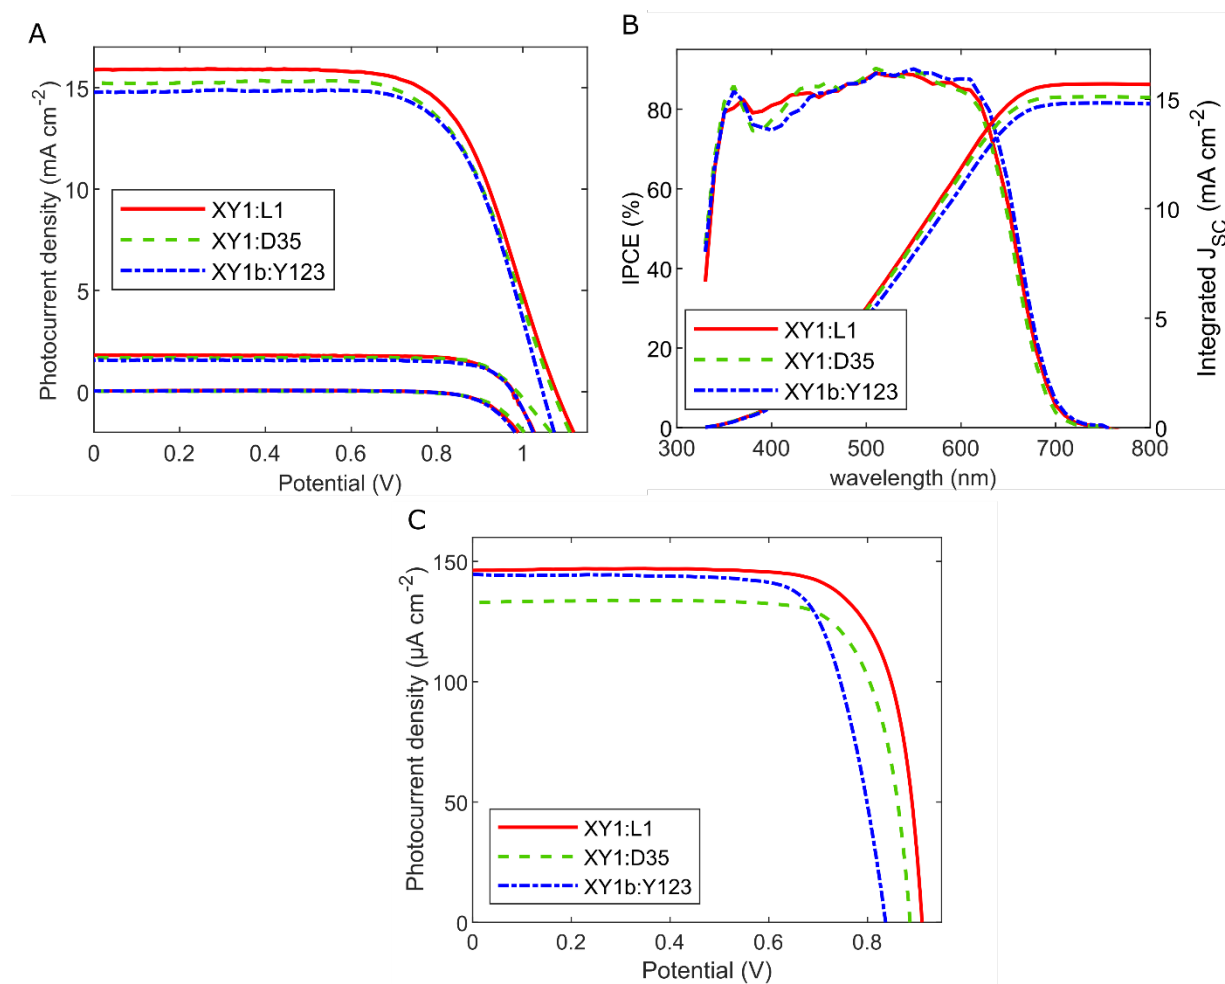

**Fig. S2.** (A) Photovoltaic performance under simulated sunlight (AM 1.5G, 100 mW cm<sup>-2</sup>), 10% sunlight as well as dark currents and (B) Incident-photon-to-current-conversion efficiency comparing XY1:L1-sensitized solar cells to sensitizer combinations XY1:D35 and XY1b:Y123. All corresponding parameters are listed in Table S1. (C) Photovoltaic performance of XY1:L1, XY1:D35 and XY1b:Y123 sensitized solar cells illuminated with 1000 lux fluorescent light. Corresponding parameters are listed in Table S3.

**Fig. S3.** Photovoltaic characterization.

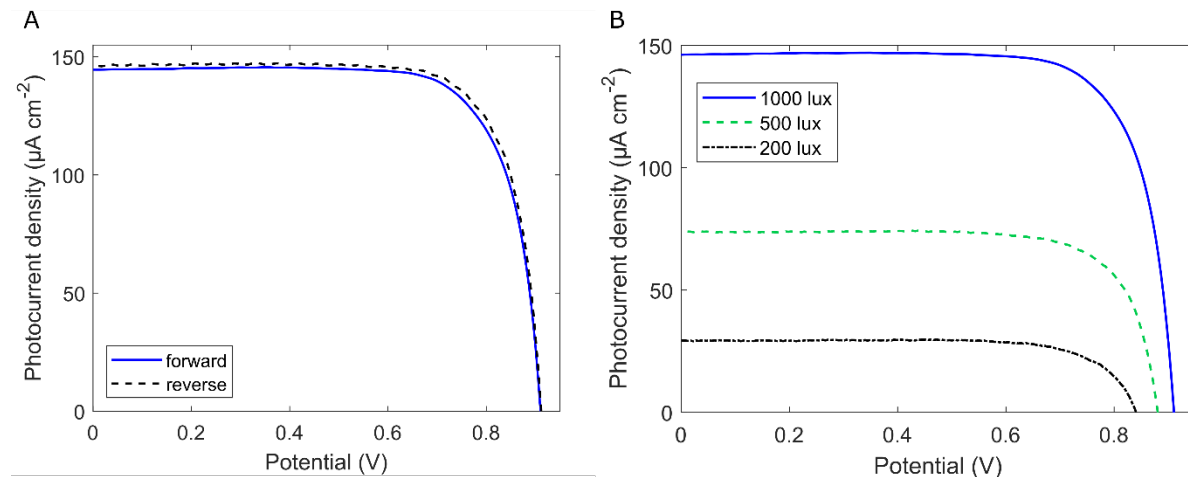

**Fig. S3. (A)** Forward (33.1%) and reverse (34.0%) scan of an XY1:L1-sensitized solar cell under 1000 lux fluorescent light. Full parameter list in Table S4. **(B)** Photovoltaic performance of an XY1:L1-sensitized solar cell illuminated by a fluorescent lamp at different intensities. Parameters in Table 1.

**Fig. S4.** Electron lifetime and transport time.

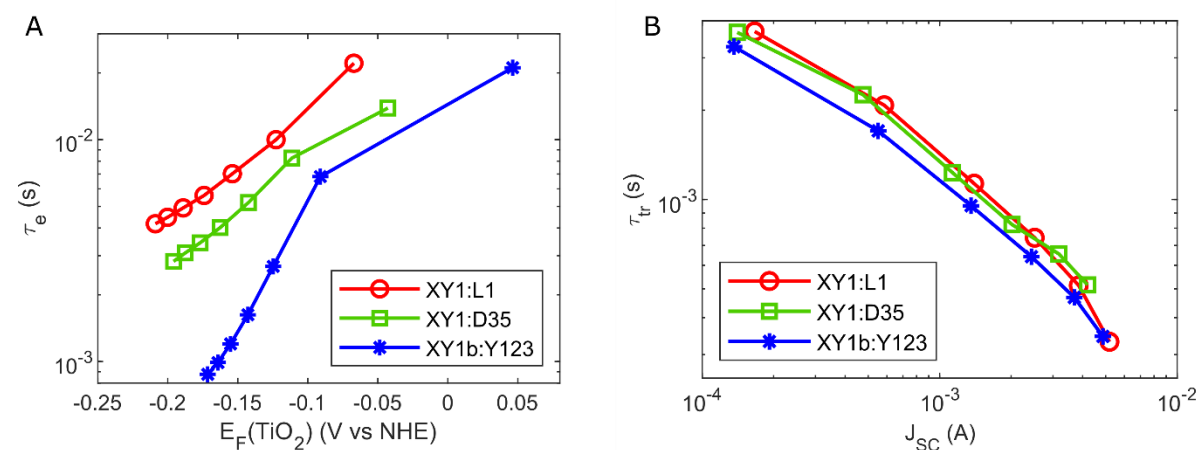

**Fig. S4. (A)** Electron lifetime in XY1:L1, XY1:D35 and XY1:Y123-sensitized solar cells. The measurements were aligned to the effective Fermi energy of electrons in the  $\text{TiO}_2$  (in Volts vs NHE), which was calculated via  $E_F = V_{OC} - E_{redox}$ , where  $V_{OC}$  is the open-circuit voltage of the cell and  $E_{redox}$  represents the redox potential of the  $\text{Cu}^{II/I}(\text{tmby})_2$  redox electrolyte. **(B)** Transport time.

**Fig. S5.** Dye regeneration.

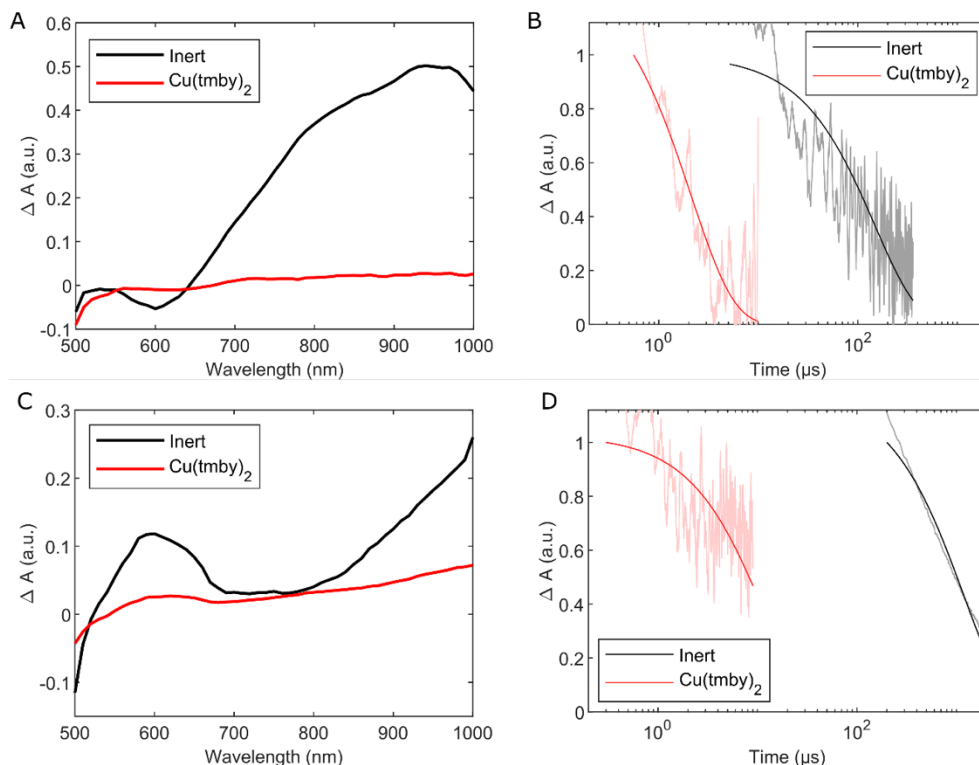

**Fig. S5:** (A) Photoinduced absorption spectra of XY1-sensitized photoanodes in inert and  $\text{Cu}^{\text{II/I}}(\text{tmby})_2$  electrolyte. (B) Transient absorption spectra of XY1-sensitized photoanodes in inert and  $\text{Cu}^{\text{II/I}}(\text{tmby})_2$  electrolyte with single-exponential fits. The pump wavelength was 555 nm, the absorption was monitored at 780 nm. Half-times of the absorption decay yield a recombination time of 33  $\mu\text{s}$  in the inert measurement and a 1.9  $\mu\text{s}$  regeneration time for the  $\text{Cu}^{\text{II/I}}(\text{tmby})_2$  redox couple, resulting in a regeneration efficiency of 94%. (C) Photoinduced absorption spectra of L1-sensitized photoanodes in inert and  $\text{Cu}^{\text{II/I}}(\text{tmby})_2$  electrolyte. (D) Transient absorption spectra of L1-sensitized photoanodes in inert and  $\text{Cu}^{\text{II/I}}(\text{tmby})_2$  electrolyte with single-exponential fits. The pump wavelength was 470 nm, the absorption was monitored at 620 nm. Half-times of the absorption decay yield a recombination time of 1.02 ms in the inert measurement and a 0.8  $\mu\text{s}$  regeneration time for the  $\text{Cu}^{\text{II/I}}(\text{tmby})_2$  redox couple, resulting in a regeneration efficiency of 99.9%.

**Fig. S6.** Spectrum of the OSRAM fluorescent tube.

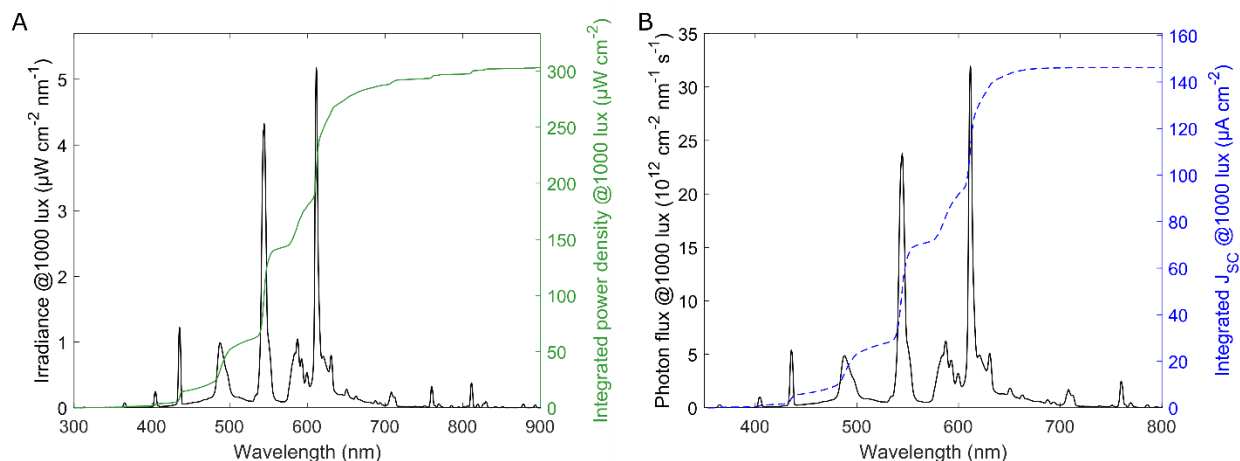

**Fig. S6: (A)** Spectrum of the Osram 930 warm white fluorescent tube. After calibration with a lux meter, the spectral distribution was weighed with the luminous efficiency function to obtain the power distribution (right axis). The power density was integrated to yield 303.1  $\mu\text{W cm}^{-2}$ . **(B)** The photon flux of the fluorescent lamp integrated with the IPCE spectrum of an XY1:L1-sensitized solar cell (shown in Fig. 2C) to obtain a photocurrent density of 146  $\mu\text{A cm}^{-2}$  (compare Fig. S2, Table S3: 147  $\mu\text{A cm}^{-2}$ ).

**Fig. S7.** Characterization of large DSCs.

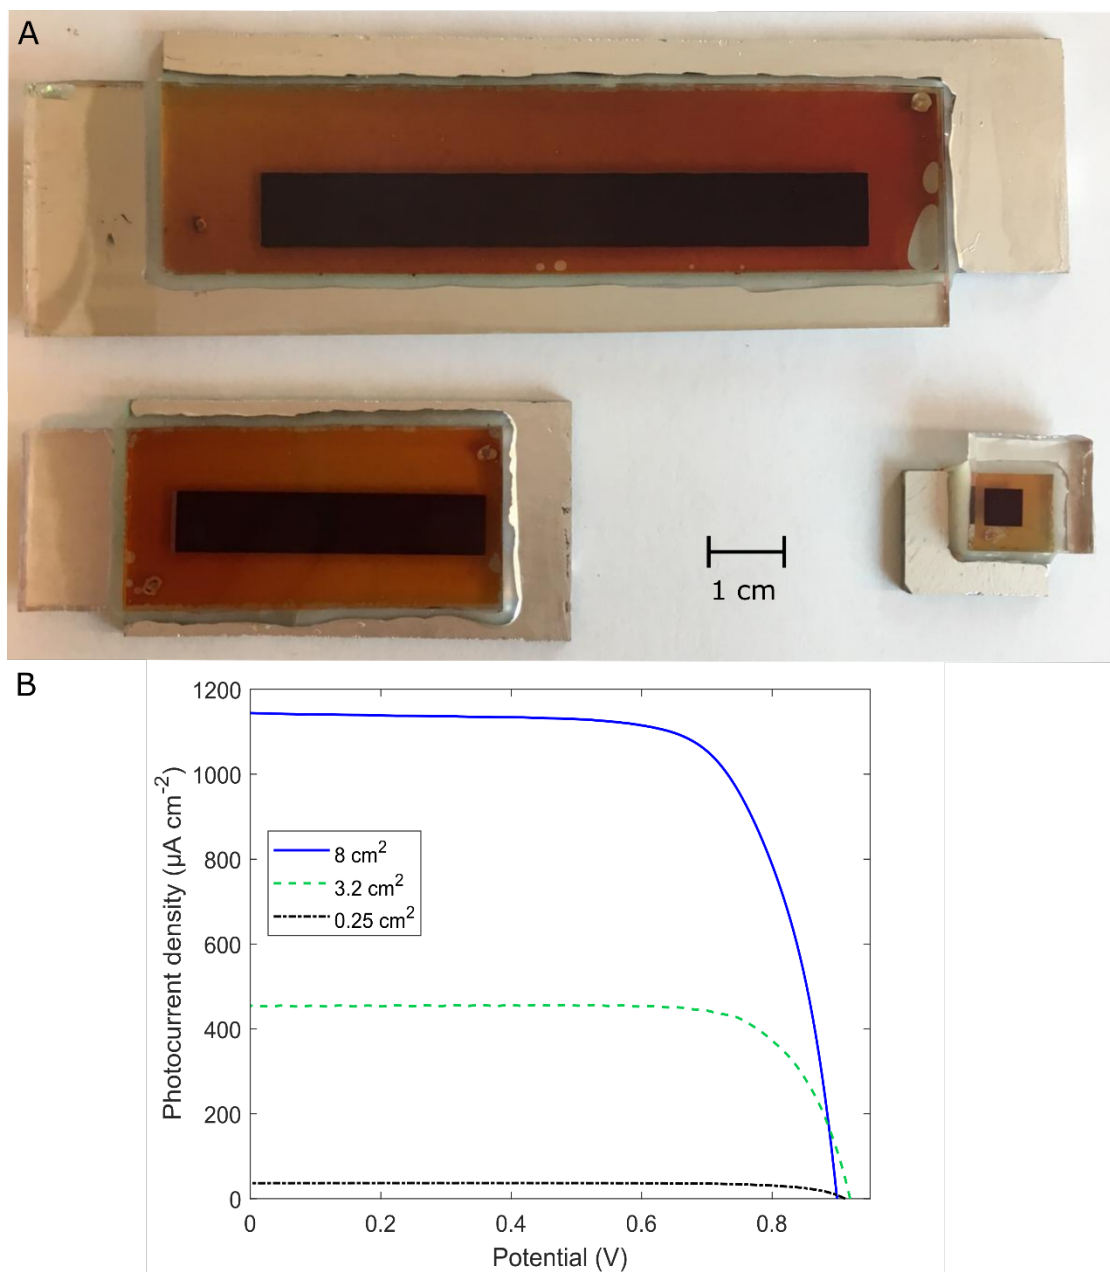

**Fig S7:** (A) 0.25 cm<sup>2</sup>, 3.2 cm<sup>2</sup> (4 cm x 0.8 cm) and 8 cm<sup>2</sup> (8 cm x 1 cm) XY1:L1 sensitized solar cells with Cu<sup>II/I</sup>(tmby)<sub>2</sub> electrolyte. (B) Photovoltaic characterization of XY1:L1-sensitized solar cells under 1000 lux fluorescent light. Corresponding parameters in Table S5.

**Fig. S8.** Fabrication of solid-state ‘Zombie’ DSCs.

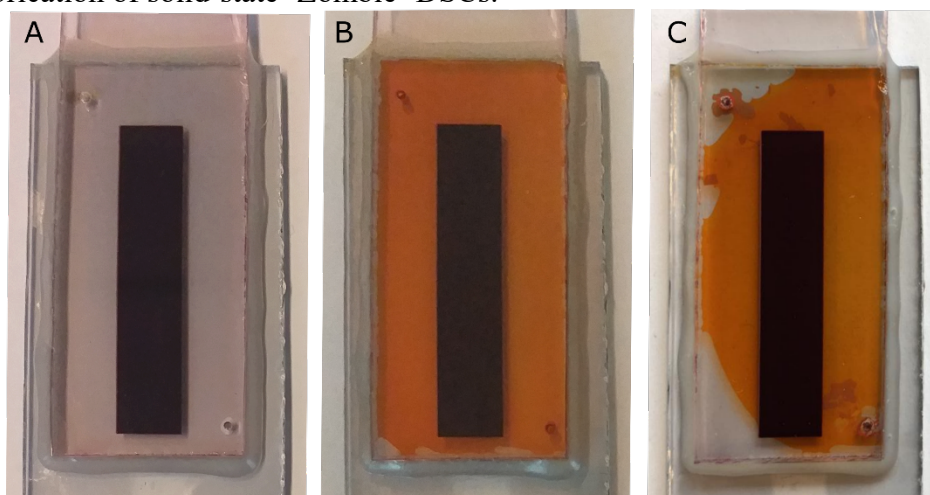

**Fig. S8.** The fabrication of solid-state ‘Zombie’ DSCs. **(A)** The XY1:L1 co-sensitized photoanode assembled with PEDOT counter electrode in inert electrolyte (0.1 M LiTFSI, 0.6 M *tert*-butylpyridine in acetonitrile). **(B)** Assembled cell filled with  $\text{Cu}^{\text{II/I}}(\text{tmby})_2$  electrolyte. **(C)** The electrolyte dries in ambient air to form the ‘Zombie’ solid-state DSC.

**Fig. S9.** Characterization of ‘Zombie’ solid-state DSCs.

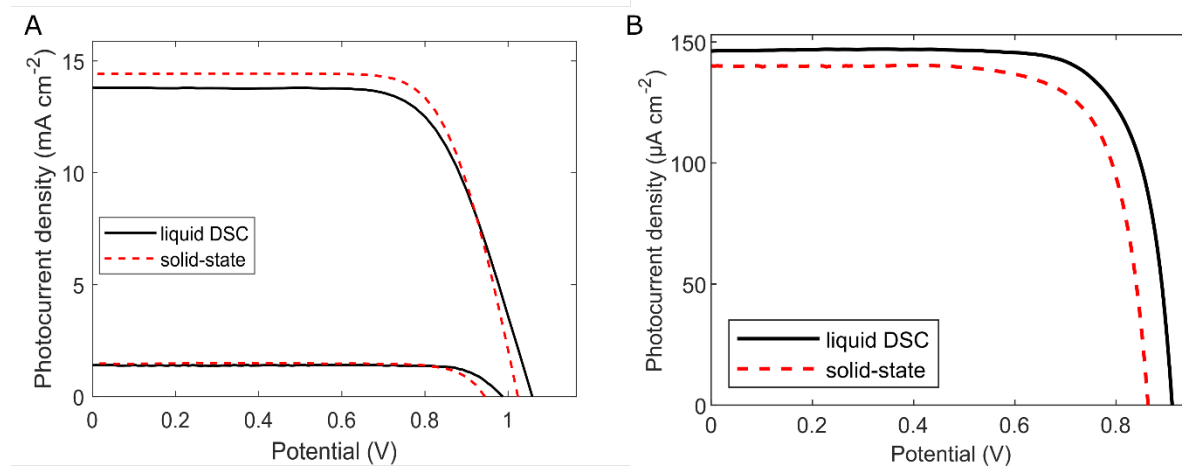

**Fig. S9. (A)** Photovoltaic characterization of liquid-DSCs and solid-state ‘Zombie’ DSCs with XY1:L1 as sensitizers and  $\text{Cu}^{\text{II/I}}(\text{tmby})_2$  as electrolyte / hole transport material under AM 1.5G simulated sunlight as well as 10% sunlight and **(B)** under 1000 lux fluorescent light. All corresponding parameters can be found in Table S6.



**Fig. S10.** Energy harvester and pseudocode.

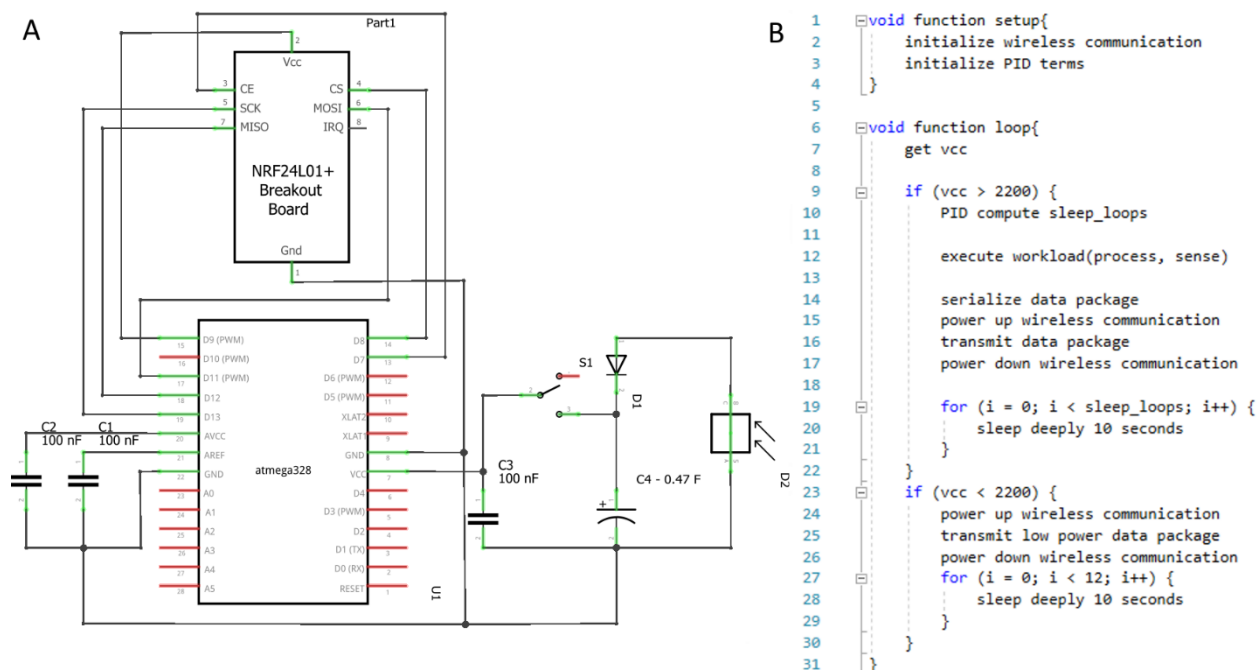

**Fig. S10. (A)** Schematic of the basic energy harvester with microcontroller U1, wireless transceiver P1, light harvester L1 and energy buffer (C4) **(B)** Pseudocode of benchmarks running on energy harvesting circuit

**Fig. S11.** Stabilized power output and charging of supercapacitor.

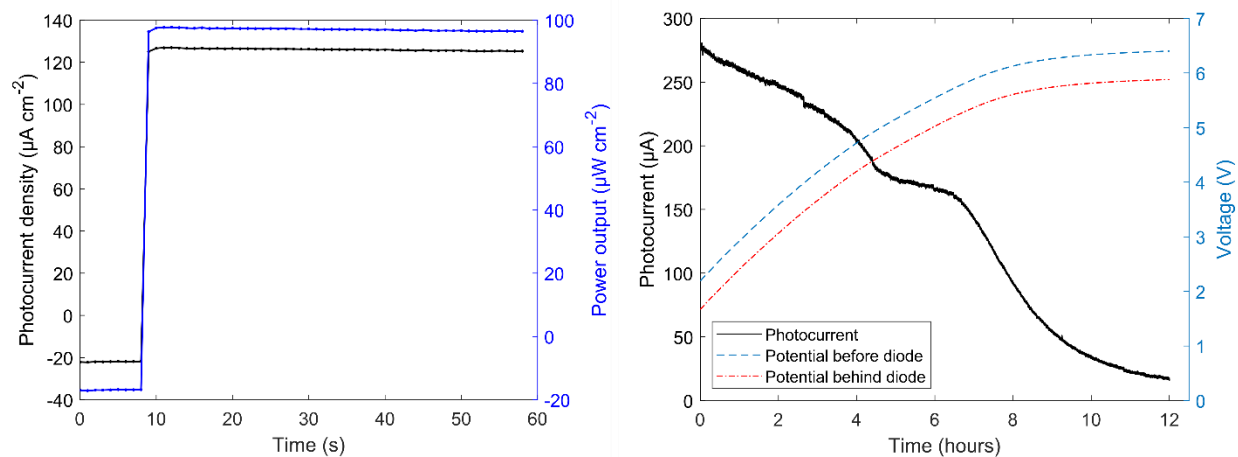

**Fig. S11. (A)** Steady-state power output at the maximum power point (MPP) of a DSC under 1000 lux fluorescent light, recorded at  $V_{MPP} = 0.77$  V. A  $J_{MPP}$  of  $126 \mu A cm^{-2}$  and  $P_{MPP}$  of  $97.0 \mu W cm^{-2}$  translate into 32.0% steady-state power conversion efficiency. **(B)** A 1.5 F @ 5 V supercapacitor is being charged by an array of eight serial 3.2 cm-2 XY1:L1-sensitized solar cells through a rectifying diode. As the potential in the capacitor is building up (right), the photocurrent decreases. The S-shape of the charging curve is likely attributed to slight MPP mismatching within the serial solar cell array.

**Table S1.** Photovoltaic characterization of DSCs under simulated sunlight.

**Table S1.** Photovoltaic parameters for XY1:L1, XY1:D35 and XY1b:Y123 sensitized solar cells under AM 1.5G illumination ( $100 \text{ mW cm}^{-2}$ ). Photovoltaic parameters under 10% sunlight in parentheses. Scanning the champion XY1:L1-sensitized cell in darkness yielded a saturation current of  $5 \text{ nA cm}^{-2}$  as well as an ideality factor of 1.92.

|                                          | XY1            | L1             | XY1:L1         | XY1:D35        | XY1b:Y123      |
|------------------------------------------|----------------|----------------|----------------|----------------|----------------|
| $V_{OC}$ (mV)                            | 1000<br>(930)  | 910<br>(830)   | 1080<br>(980)  | 1070<br>(980)  | 1050<br>(970)  |
| $J_{SC}$<br>( $\text{mA cm}^{-2}$ )      | 13.3<br>(1.59) | 9.4<br>(1.00)  | 15.9<br>(1.80) | 15.3<br>(1.69) | 14.7<br>(1.56) |
| $J_{SC,IPCE}$<br>( $\text{mA cm}^{-2}$ ) | 13.3           | 9.0            | 15.7           | 15.1           | 14.8           |
| Fill Factor                              | 0.67<br>(0.80) | 0.71<br>(0.80) | 0.67<br>(0.77) | 0.67<br>(0.77) | 0.70<br>(0.80) |
| PCE (%)                                  | 8.9<br>(11.8)  | 6.1<br>(6.7)   | 11.5<br>(13.7) | 11.0<br>(13.0) | 10.9<br>(12.1) |

**Table S2.** Photovoltaic characterization of DSCs under ambient light: Sensitizer ratio.

**Table S2.** Photovoltaic characterization of XY1:L1 co-sensitized solar cells under 1000 lux fluorescent light. The first column indicates the relative molar ratios of sensitizers XY1 and L1 in the dye solution.

|              | $V_{OC}$ (mV) | $J_{SC}$ ( $\mu A\ cm^{-2}$ ) | Fill Factor | PCE (%)     |
|--------------|---------------|-------------------------------|-------------|-------------|
| XY1          | 850           | 114.2                         | 0.78        | 24.6        |
| 5:1          | 850           | 120                           | 0.76        | 25.5        |
| 2.5:1        | 870           | 138                           | 0.77        | 30.5        |
| 1:1          | 890           | 143                           | 0.77        | 32.3        |
| <b>1:2.5</b> | <b>910</b>    | <b>147</b>                    | <b>0.77</b> | <b>34.0</b> |
| 1:5          | 910           | 140                           | 0.76        | 31.9        |
| L1           | 760           | 58                            | 0.78        | 11.2        |

**Table S3.** Photovoltaic characterization of DSCs under ambient light: Sensitizer combinations.

**Table S3:** Photovoltaic parameters for XY1:L1, XY1:D35 and XY1:Y123-sensitized solar cells under 1000 (303.1  $\mu\text{W cm}^{-2}$ ) lux fluorescent light (normalized short-circuit current density and power output in parentheses).

|                                                                   | XY1            | L1            | XY1:L1          | XY1:D35        | XY1b:Y123      |
|-------------------------------------------------------------------|----------------|---------------|-----------------|----------------|----------------|
| $V_{\text{OC}}$ (mV)                                              | 850            | 750           | 910             | 880            | 840            |
| $J_{\text{SC}}$ ( $\mu\text{A}$ )<br>(( $\mu\text{A cm}^{-2}$ ))  | 30.0<br>(120)  | 14.5<br>(58)  | 36.7<br>(147)   | 33.0<br>(132)  | 36.3<br>(145)  |
| $J_{\text{SC,IPCE}}$<br>( $\mu\text{A cm}^{-2}$ )                 |                |               | 146             |                |                |
| Fill Factor                                                       | 0.74           | 0.78          | 0.77            | 0.77           | 0.75           |
| $P_{\text{max}}$ ( $\mu\text{W}$ )<br>(( $\mu\text{W cm}^{-2}$ )) | 18.9<br>(75.4) | 8.6<br>(34.4) | 25.7<br>(103.1) | 22.4<br>(89.4) | 22.7<br>(91.2) |
| PCE (%)                                                           | 24.9           | 11.3          | 34.0            | 29.5           | 30.1           |

**Table S4.** Photovoltaic characterization of DSCs under ambient light: Hysteresis data.

**Table S4:** Hysteresis data for an XY1:L1-sensitized solar cell under 1000 lux fluorescent light (normalized short-circuit current density and power output in parentheses).

|                                                 | forward         | reverse         |
|-------------------------------------------------|-----------------|-----------------|
| $V_{oc}$ (mV)                                   | 910             | 910             |
| $J_{sc}$ ( $\mu A$ )<br>(( $\mu A\ cm^{-2}$ ))  | 36.3<br>(145)   | 36.7<br>(147)   |
| Fill Factor                                     | 0.76            | 0.77            |
| $P_{max}$ ( $\mu W$ )<br>(( $\mu W\ cm^{-2}$ )) | 25.7<br>(103.1) | 25.1<br>(100.3) |
| PCE (%)                                         | 34.0            | 33.1            |

**Table S5.** Characterization of large DSCs under ambient light.

**Table S5.** Photovoltaic parameters for XY1:L1-sensitized solar cells under 1000 lux, fluorescent light (normalized short-circuit current density and power output in parentheses).

|                                                 | 0.25 cm <sup>2</sup> | 3.2 cm <sup>2</sup> | 8 cm <sup>2</sup> |
|-------------------------------------------------|----------------------|---------------------|-------------------|
| $V_{oc}$ (mV)                                   | 910                  | 910                 | 900               |
| $J_{sc}$ ( $\mu A$ )<br>(( $\mu A\ cm^{-2}$ ))  | 36.7<br>(147)        | 454<br>(142)        | 1140<br>(142)     |
| Fill Factor                                     | 0.77                 | 0.78                | 0.73              |
| $P_{max}$ ( $\mu W$ )<br>(( $\mu W\ cm^{-2}$ )) | 25.7<br>(103.1)      | 332<br>(100.3)      | 740<br>(92.5)     |
| PCE (%)                                         | 34.0                 | 33.2                | 30.6              |

**Table S6.** Statistics of photovoltaic parameters.

**Table S6.** Photovoltaic parameters of liquid-electrolyte DSCs and solid-state ‘Zombie’ DSCs with XY1:L1 as sensitizers and  $\text{Cu}^{\text{II/I}}(\text{tmby})_2$  as electrolyte / hole transport material under AM 1.5G as well as 10% sunlight and under 1000 lux fluorescent light.

\*Champion device.

‡Average of three batches of liquid-electrolyte DSCs (total of 40 cells).

†Average of those cells that were dried to characterize ‘Zombie’ ssDSCs (8 cells).

|                                  |        | $V_{\text{OC}}$<br>(mV) | $J_{\text{SC}}$<br>(mA cm <sup>-2</sup> ) | Fill Factor | PCE<br>[%] |
|----------------------------------|--------|-------------------------|-------------------------------------------|-------------|------------|
| AM 1.5G<br>simulated<br>sunlight | DSC*   | 1080                    | 15.9                                      | 0.67        | 11.5       |
|                                  | DSC‡   | 1060                    | 15.2                                      | 0.68        | 11.0       |
|                                  | DSC†   | 1050                    | 13.9                                      | 0.70        | 10.2       |
|                                  | ssDSC* | 1020                    | 14.5                                      | 0.72        | 10.7       |
|                                  | ssDSC† | 1020                    | 14.3                                      | 0.71        | 10.4       |
| 10% sunlight                     | DSC*   | 980                     | 1.80                                      | 0.78        | 13.7       |
|                                  | ssDSC* | 940                     | 1.47                                      | 0.80        | 11.2       |
| 1000 lux<br>fluorescent          | DSC*   | 910                     | 0.147                                     | 0.77        | 34.0       |
|                                  | ssDSC* | 860                     | 0.137                                     | 0.77        | 30.0       |
